# Supplementary material for: Prediction of high carrier mobility for novel Janus Mo8S6Se6 monolayers with different phases: first principles calculations
Source: Royal Society of Chemistry journal article supplement (doi:10.1039/d4tc01745e), 2024-01-01
Supplement: d4tc01745e1.pdf [file d4tc01745e1.pdf]

## Prediction of high carrier mobility for novel Janus $\text{Mo}_8\text{S}_6\text{Se}_6$ monolayers with different phases: first principles calculations

Yi Peng<sup>a,b</sup>; Xuli Li<sup>a</sup>; Xinyi Tang<sup>a</sup>; Ju Jiao<sup>a</sup>; Qianqian Zhu<sup>\*a</sup>; Juexian Cao<sup>\*c</sup>

**a:** School of Physics and Electronic-Electrical Engineering, Xiangnan University, Chenzhou 423000, P. R. China

**b:** Microelectronics and Optoelectronics Technology Key Laboratory of Hunan Higher Education, School of Physics and Electronic Electrical Engineering, Xiangnan University, Chenzhou 423000, P. R. China

**c:** School of Physics and Optoelectronics & Hunan Institute of Advanced Sensing and Information Technology, Xiangnan University, Xiangtan 411105, PR China

\* Corresponding Author: pengzhu2022@yeah.net

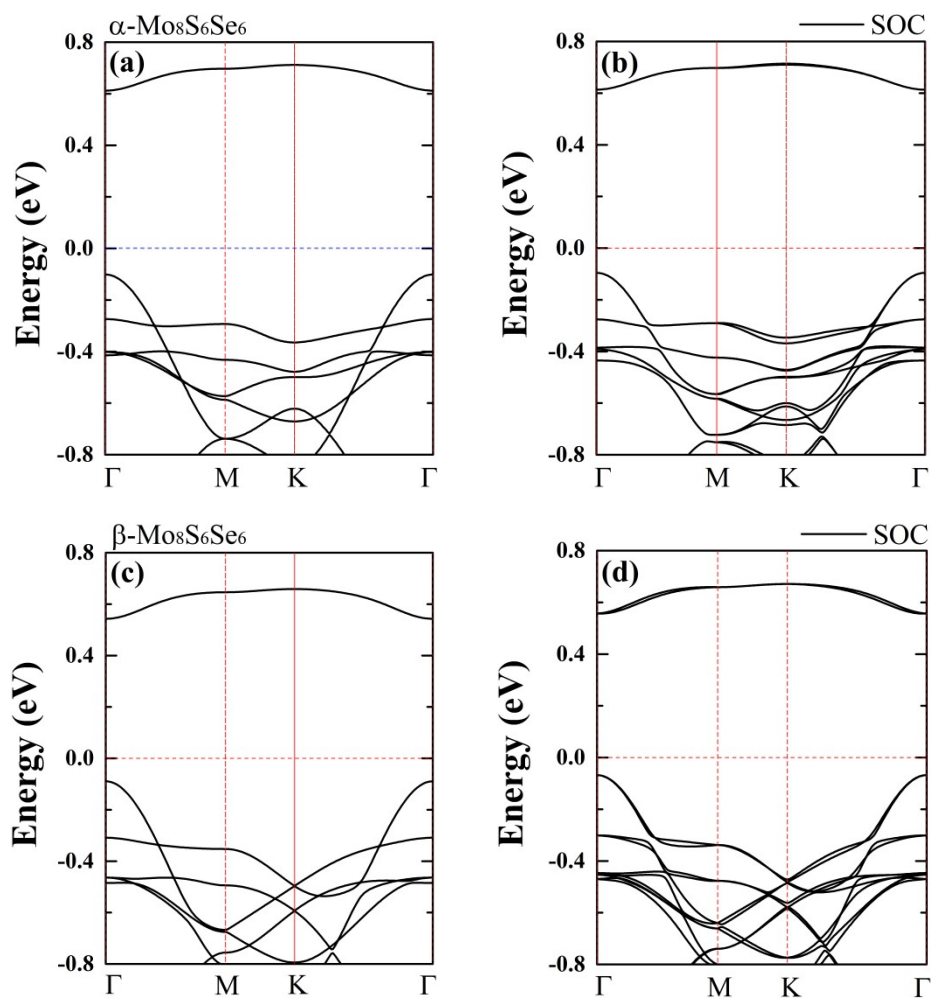

**Fig. S1.** The energy band structures of Janus  $\text{Mo}_8\text{S}_6\text{Se}_6$  monolayers with  $\alpha$ - (a, b) and  $\beta$ -phases (c, d) using GGA (a, c) and GGA+SOC (b, d).
